# Supplementary material for: Modulation doping of transition metal dichalcogenide/oxide heterostructures
Source: Royal Society of Chemistry journal article supplement (doi:10.1039/c6tc04640a), 2016-12-02
Supplement: c6tc04640a1.pdf [file c6tc04640a1.pdf]

## Layer-dependent Modulation Doping of MoS<sub>2</sub> by Transition Metal Oxides (Supplementary Information)

Received 00th January 20xx,  
Accepted 00th January 20xx

Kang Xu,<sup>a</sup> Yi Wang,<sup>a</sup> Yuda Zhao<sup>a</sup> and Yang Chai<sup>\*a</sup>

DOI: 10.1039/x0xx00000x

www.rsc.org/

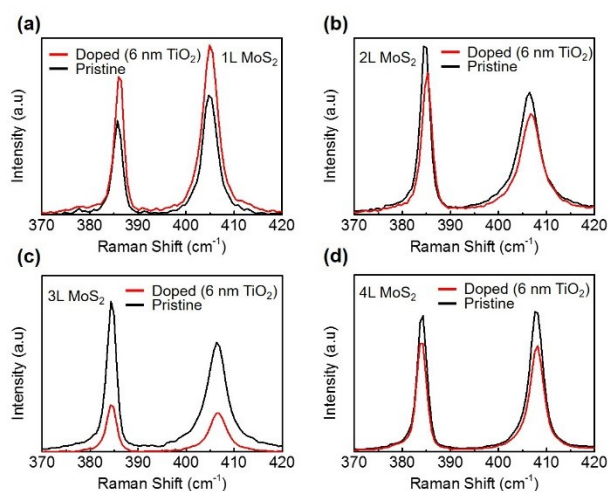

**Fig. S1** Raman spectra of 1-4L MoS<sub>2</sub> before (black line) and after (red line) 6-nm-thick TiO<sub>2</sub> doping.

**Fig. S2** PL and Raman spectra of 1L-3L MoS<sub>2</sub> before and after being

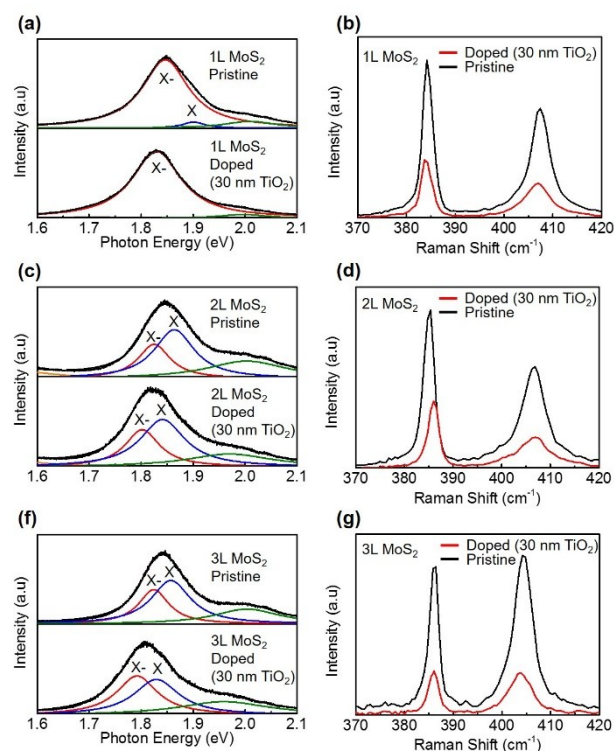

doped with 30-nm-thick TiO<sub>2</sub>. The three panels listed on the left side are PL spectra and those listed on the right side are corresponding Raman spectra.

<sup>a</sup> Department of Applied Physics, The Hong Kong Polytechnic University, Hung Hom, Kowloon, Hong Kong, P. R. China.

† Footnotes relating to the title and/or authors should appear here.

Electronic Supplementary Information (ESI) available: [details of any supplementary information available should be included here]. See DOI: 10.1039/x0xx00000x

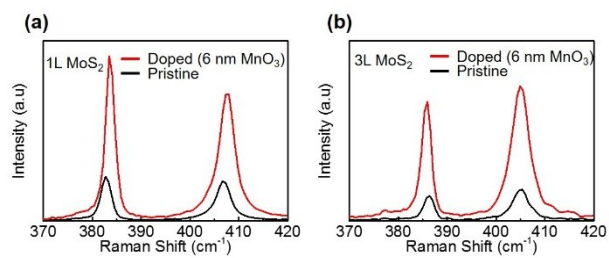

**Fig. S3** Raman spectra of 1L (a) and 3L (b) MoS<sub>2</sub> before (black line) and after (red line) 6-nm-thick MoO<sub>3</sub> doping.
